# Supplementary material for: Evolution and Selection in Yeast Promoters: Analyzing the Combined Effect of Diverse Transcription Factor Binding Sites
Source: PLOS journal article supplement (doi:10.1371/journal.pcbi.0040007), 2008-01-08
Supplement: S1 (10.1371/journal.pcbi.0040007.s001) [file journal.pcbi.0040007.s001]

**Table S**1: Alignment data statistics

|  | similarity | gaps |
| --- | --- | --- |
| *cerevisiae – paradoxus* | 83.2% | 4.3% |
| *cerevisiae – mikatae* | 74.2% | 7.2% |
| *cerevisiae - bayanus* | 67.1% | 11.2% |
